# Supplementary figures and images for: Hydrolysis of pea protein differentially modulates its effect on iron bioaccessibility, sulfur availability, composition and activity of gut microbial communities in vitro
Source: Royal Society of Chemistry journal article supplement (doi:10.1039/d3fo00504f), 2023-01-01

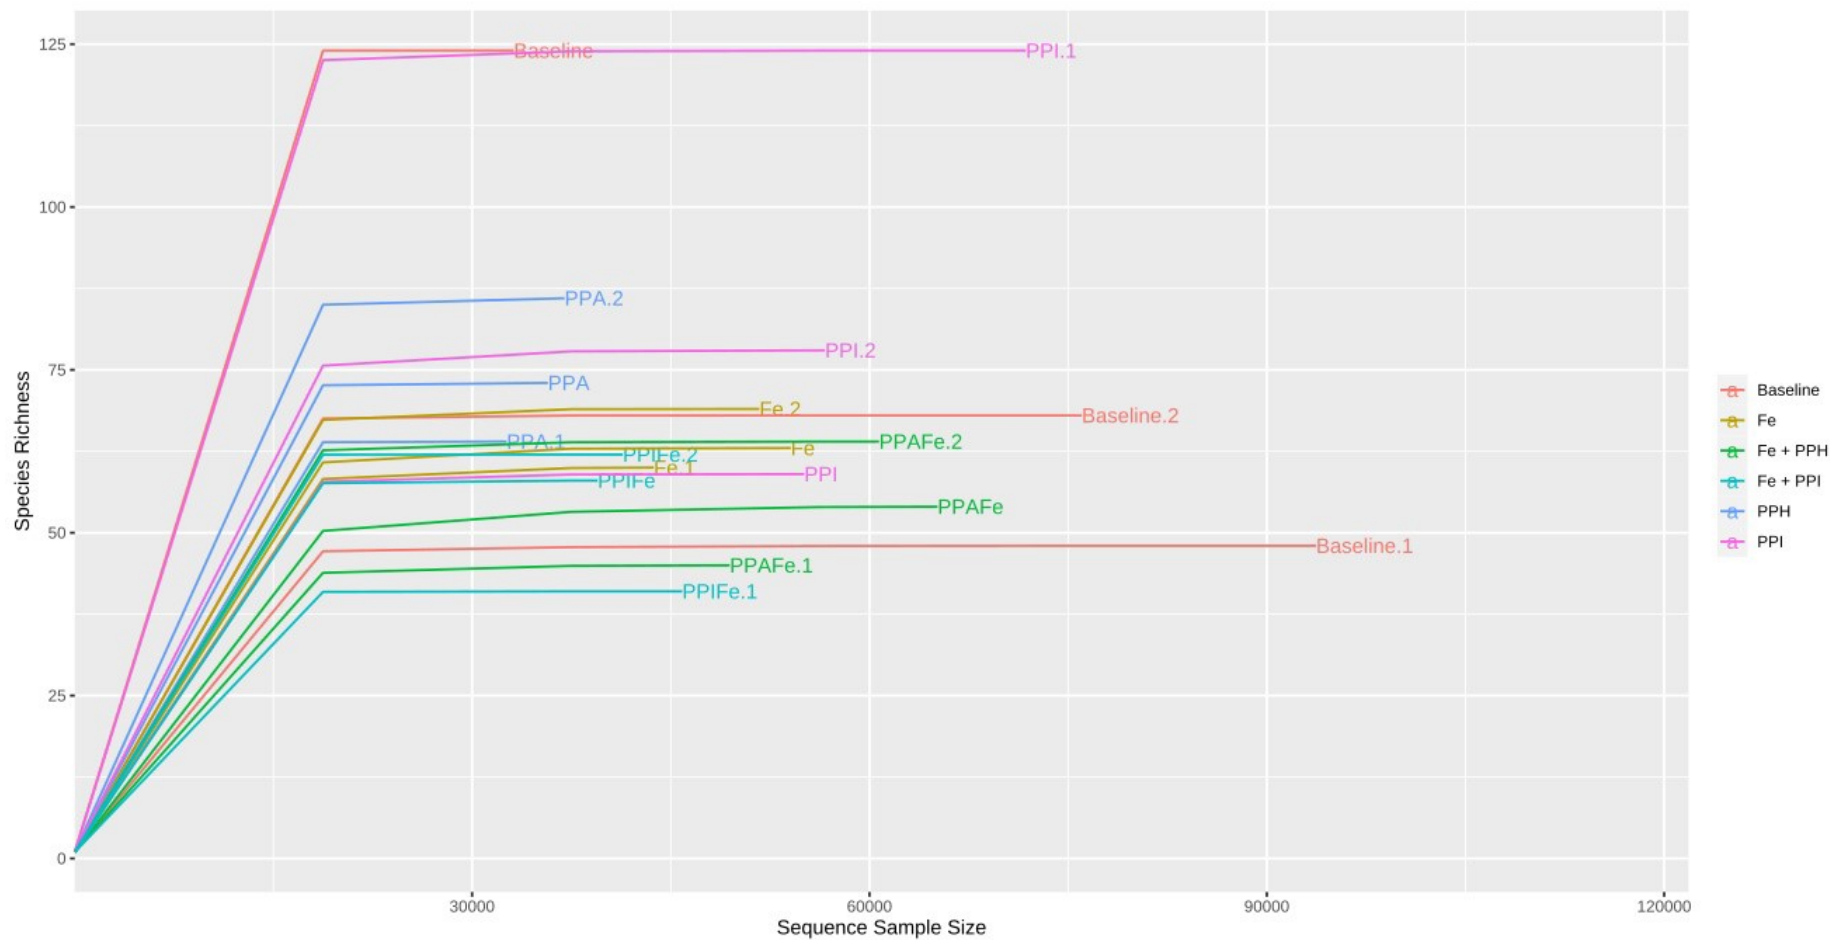

Supplement: d3fo00504f1.pdf [file d3fo00504f1.pdf]
